# Supplementary material for: Involving research participants in a pan-European research initiative: the EPAD participant panel experience
Source: PubMed Central journal article supplement (PMC7566117; doi:10.1186/s40900-020-00236-z), 2020-10-15
Supplement: 40900_2020_236_MOESM1_ESM.pdf [file 40900_2020_236_MOESM1_ESM.pdf]

## INVOLVING RESEARCH PARTICIPANTS IN A PAN-EUROPEAN RESEARCH INITIATIVE: THE EPAD PARTICIPANT PANEL EXPERIENCE: GRIPP2 Short form

| <b>Section and topic</b>            | <b>Item</b>                                                                                                                               | <b>Reported on page No</b> |
|-------------------------------------|-------------------------------------------------------------------------------------------------------------------------------------------|----------------------------|
| 1: Aim                              | Report the aim of PPI in the study                                                                                                        | 3                          |
| 2: Methods                          | Provide a clear description of the methods used for PPI in the study                                                                      | 3-6                        |
| 3: Study results                    | Outcomes—Report the results of PPI in the study, including both positive and negative outcomes                                            | 6-9                        |
| 4: Discussion and conclusions       | Outcomes—Comment on the extent to which PPI influenced the study overall. Describe positive and negative effects                          | 9-11                       |
| 5: Reflections/critical perspective | Comment critically on the study, reflecting on the things that went well and those that did not, so others can learn from this experience | 11                         |
